# Supplementary material
Source: PubMed Central journal article supplement (PMC4134343)
Supplement: prio-7-383-s01.pdf [file prio-7-383-s01.pdf]

## **Supplemental Material to:**

**Franc Llorens, Belen Ansoleaga, Paula Garcia ESparcia,  
Saima Zafar, Oriol Grau Rivera, Irene López-González, Rosa  
Blanco, Margarita Carmona, Jordi Yagüe, Carlos Nos, Jose  
Antonio del Rio, Ellen Gelpi, Inga Zerr, Isidre Ferrer**

**PrP mRNA and protein expression in brain and PrPc  
in CSF in Creutzfeldt-Jakob disease MM1 and VV2**

**Prion 2013; 7(5)**

**<http://dx.doi.org/10.4161/pri.26416>**

**<http://www.landesbioscience.com/journals/prion/article/26416/>**

SUPPLEMENTARY FIGURE 1

A

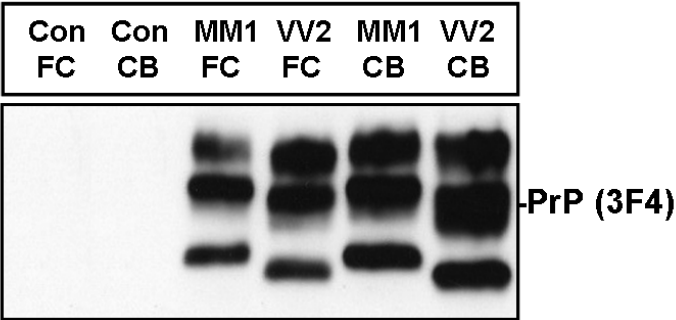

B

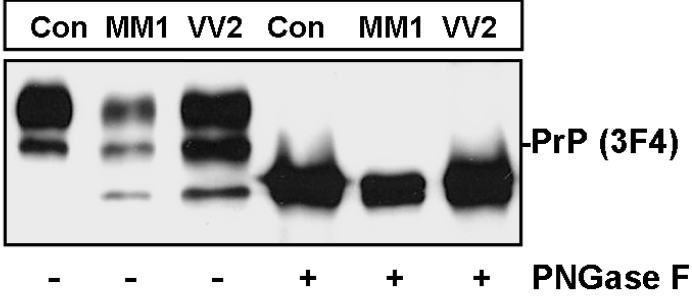

### **Supplementary Figure 1**

A) Western blot analysis of PrP<sup>sc</sup> (PK-treated) control (Con), sCJD MM1 and sCJD VV2 cases of the frontal cortex (FC) and cerebellum (CB) shows the typical pattern of two upper bands and an inner band of 20/21 kDa and 19 kDa, respectively for MM1 and VV2. B) Western blot analysis of PrP from control (Con), sCJD MM1 and sCJD VV2 cases after PNGase treatment. Lower bands indicate un-glycosylated PrP forms.

## SUPPLEMENTARY FIGURE 2

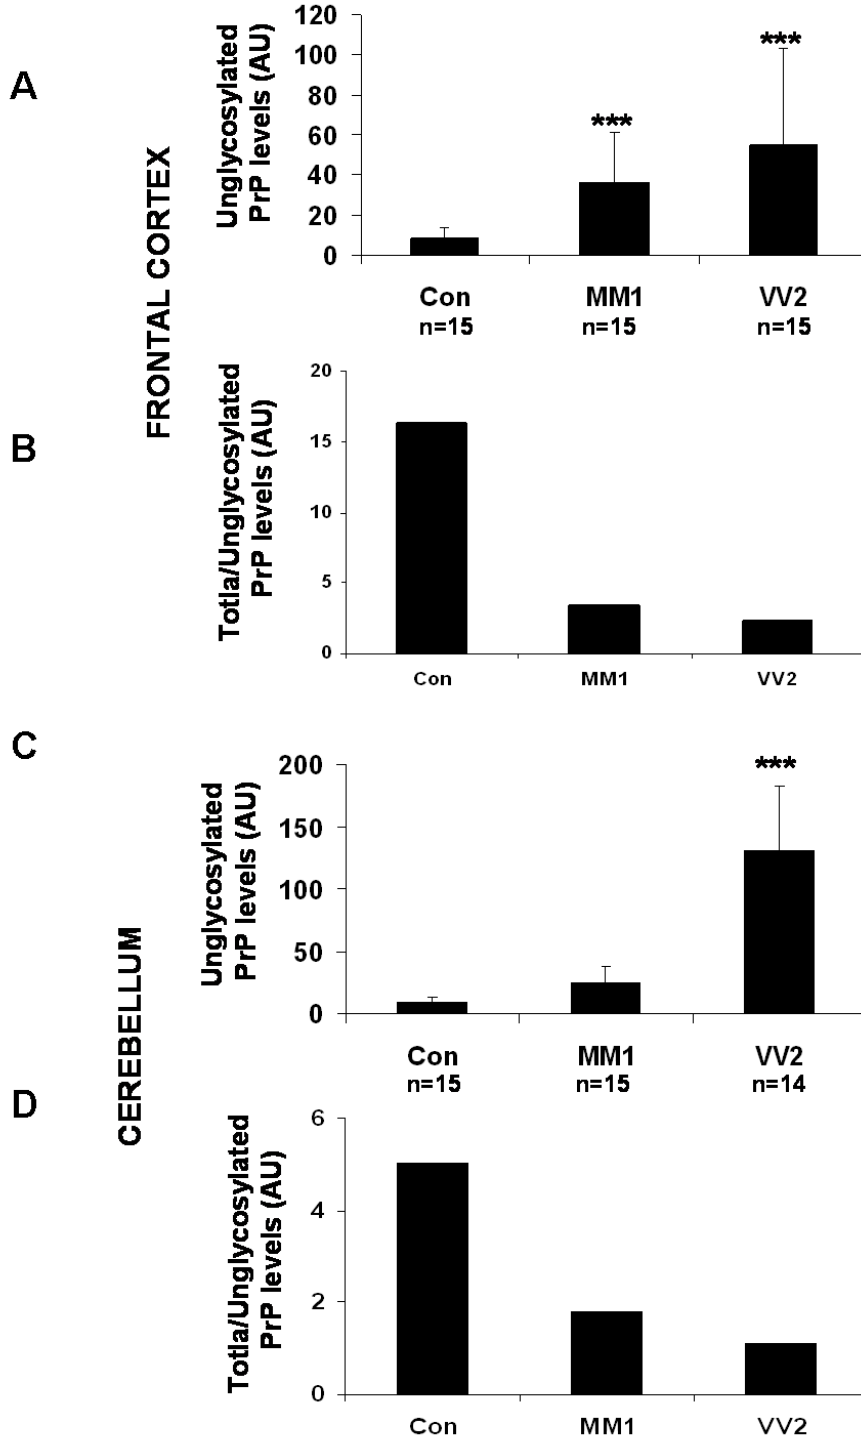

## **Supplementary Figure 2**

A) Densitometric values of the un-glycosylated PrP (lower molecular weight PrP) band and B) Ratio between total/un-glycosylated PrP in the frontal cortex of control (Con), sCJD MM1 and VV2 subtype cases. C) Densitometric values of un-glycosylated PrP (lower molecular weight PrP) band and D) Ratio between total/un-glycosylated PrP in the cerebellum of control (Con), sCJD MM1 and VV2 subtype cases. \*\*\* $p > 0.001$ : control vs sCJD.
